# Supplementary material
Source: PubMed Central journal article supplement (PMC2932825)
Supplement: NIHMS228621-supplement-1_si_001.pdf [file NIHMS228621-supplement-1_si_001.pdf]

# New Reagents for Enhanced Liquid Chromatographic Separation and Charging of Intact Protein Ions for Electrospray Ionization Mass Spectrometry

Santosh G. Valeja<sup>1,2</sup>, Jeremiah D. Tipton<sup>1</sup>, Mark R. Emmett<sup>1,2,\*</sup> and Alan G. Marshall<sup>1,2,\*</sup>

<sup>1</sup>*Ion Cyclotron Resonance Program, National High Magnetic Field Laboratory, Florida State University, 1800 East Paul Dirac Drive, Tallahassee, FL, 32310-4005, U.S.A.*

<sup>2</sup>*Department of Chemistry and Biochemistry, Florida State University, Tallahassee, FL, 32306*

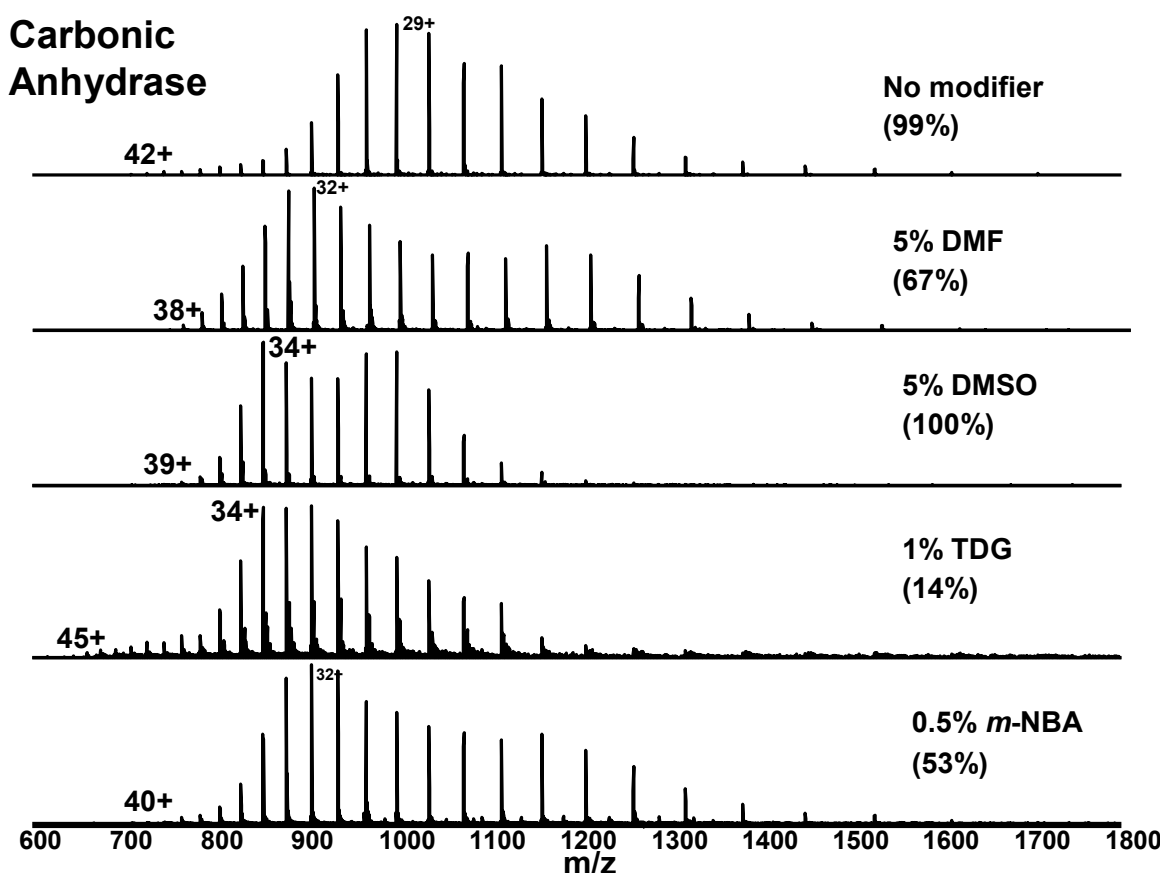

**Figure S-1.** Representative positive-ion electrospray FT-ICR mass spectra of carbonic anhydrase. The base solution was 50%/50%/0.5% water/acetonitrile/formic acid. TDG gave maximum charging of intact protein, whereas DMSO gave much higher S/N for higher charge states relative to other modifiers. The highest peak in each spectrum is reported as a percentage of the highest peak in the DMSO spectrum.

Jupiter C<sub>18</sub> Column, 5 cm x 1 mm, 100 min Elution

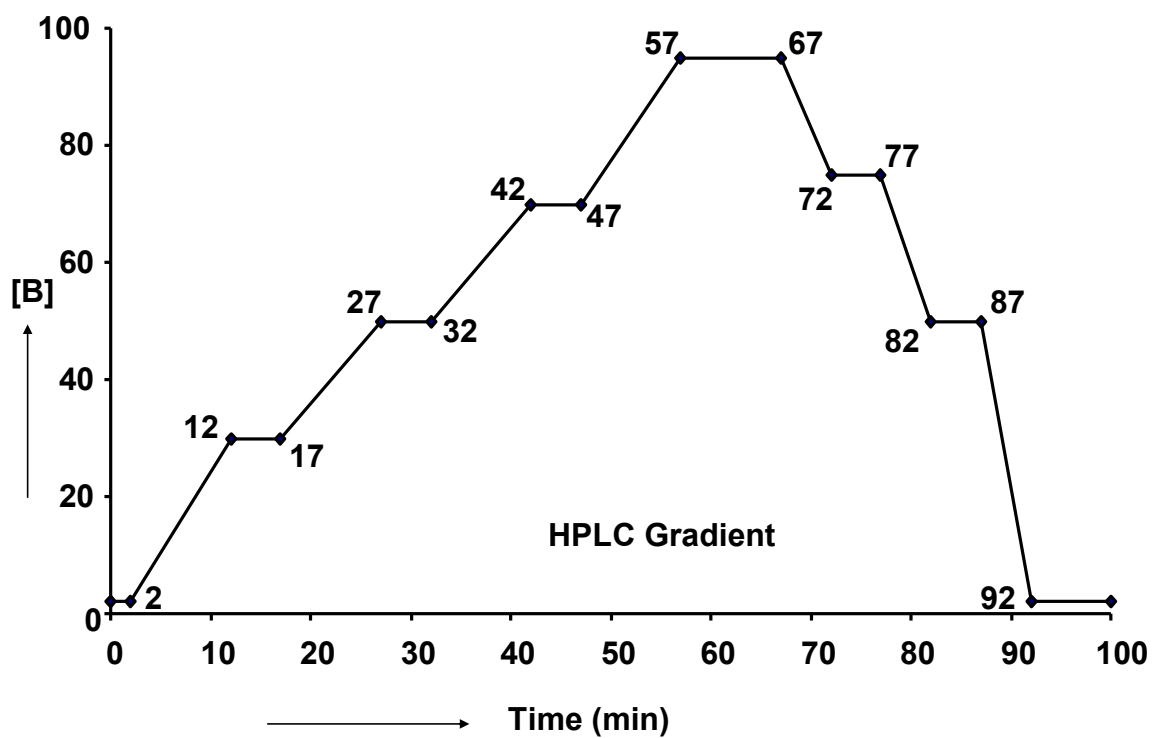

**Figure S-2.** Stepwise gradient profile for separation of protein standards with a Jupiter C<sub>18</sub> column (Figure S-3).

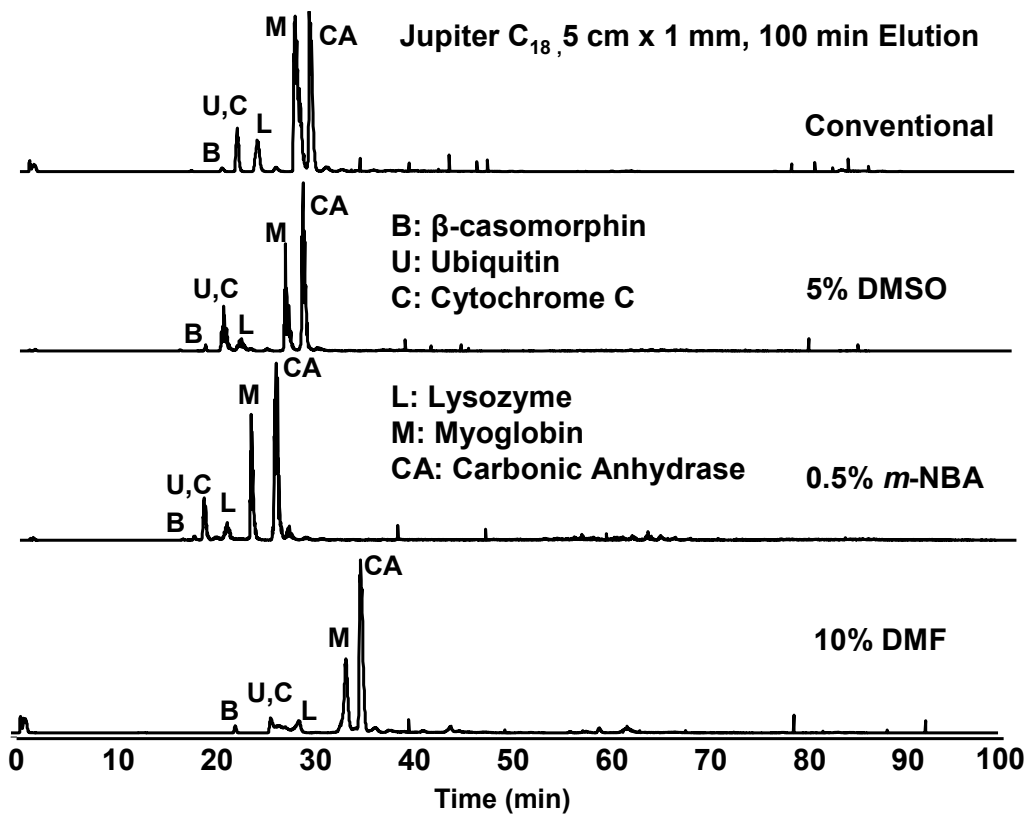

**Figure S-3.** Total ion elution profiles for a mixture of protein standards for each of four solvent systems.
